# Supplementary material for: Spontaneous asymmetrical crystallization of a three-dimensional diamondoid framework material from achiral precursors
Source: Royal Society of Chemistry journal article supplement (doi:10.1039/b919836a), 2010-01-01
Supplement: b919836a.pdf [file b919836a.pdf]

## Electronic Supplementary Information

### Spontaneous Asymmetrical Crystallization of a Three-dimensional Diamond-type Framework Material from Achiral Precursors

Shan-Ci Chen,<sup>ab</sup> Jian Zhang,<sup>a</sup> Rong-Min Yu,<sup>a</sup> Xiao-Yuan Wu,<sup>a</sup> Yi-Ming Xie,<sup>a</sup> Fei Wang<sup>a</sup> and Can-Zhong Lu<sup>a\*</sup>

<sup>a</sup> State Key Laboratory of Structure Chemistry, Fujian Institute of Research on the Structure of Matter, Chinese Academy of Sciences, Fuzhou, Fujian 350002, P. R. China

<sup>b</sup> Graduate School of Chinese Academy of Sciences, Beijing 100039, P. R. China.

\* The corresponding author, Fax: (+86)- 591-83714946; Tel: (+86)- 591-83705794; E-mail: czlu@fjirsm.ac.cn

**Table S1** A summary of the 15 structure determinations of **1** with the *R* factors and Flack absolute structure parameters for each refinement.

|          | a          | b           | c           | R <sub>1</sub> | wR <sub>2</sub> | Flack paramete |
|----------|------------|-------------|-------------|----------------|-----------------|----------------|
| <b>1</b> | 8.2676(8)  | 11.1516(11) | 11.2300(11) | 0.0299         | 0.0619          | -0.001(17)     |
| 1-1      | 8.2569(6)  | 11.1344(8)  | 11.2113(9)  | 0.0283         | 0.0630          | 0.007(16)      |
| 1-2      | 8.2756(36) | 11.1568(52) | 11.2342(53) | 0.0252         | 0.0568          | 0.008(13)      |
| 1-3      | 8.2664(12) | 11.1527(16) | 11.2213(10) | 0.0258         | 0.0490          | 0.011(11)      |
| 1-4      | 8.2725(9)  | 11.1547(13) | 11.2439(17) | 0.0274         | 0.0529          | -0.014(12)     |
| 1-5      | 8.2707(38) | 11.1570(51) | 11.2259(52) | 0.0247         | 0.0485          | -0.007(12)     |
| 1-6      | 8.2745(9)  | 11.1656(11) | 11.2413(12) | 0.0245         | 0.0521          | -0.014(15)     |
| 1-7      | 8.2670(13) | 11.2233(19) | 11.1380(20) | 0.0677         | 0.1256          | 0.02(5)        |
| 1-8      | 8.2639(7)  | 11.2145(10) | 11.1520(11) | 0.0352         | 0.0641          | -0.002(17)     |
| 1-9      | 8.3116(11) | 11.2851(15) | 11.2055(15) | 0.0438         | 0.0896          | 0.01(2)        |
| 1-10     | 8.2786(11) | 11.1824(17) | 11.2521(17) | 0.0632         | 0.1373          | 1.01(3)        |
| 1-11     | 8.2682(32) | 11.1509(41) | 11.2289(44) | 0.0249         | 0.0562          | -0.001(13)     |
| 1-12     | 8.2642(26) | 11.1573(36) | 11.2244(36) | 0.0230         | 0.0475          | -0.003(11)     |
| 1-13     | 8.2594(8)  | 11.1233(11) | 11.2100(11) | 0.0392         | 0.0720          | 0.008(17)      |
| 1-14     | 8.2454(10) | 11.1291(11) | 11.1810(14) | 0.0307         | 0.0609          | 0.016(14)      |

**UV-Vis and luminescence spectra:** The UV-Vis and luminescence spectra of the deprotonated ligand (AMTD) were measured by dissolving the HAMTD in the NaOH solution. The measurement were performed on a Perkin-Elmer Lambda 45 UV/VIS spectrophotometer and a HORIBA Jobin-Yvon FluoroMax-4 spectrometer, respectively.

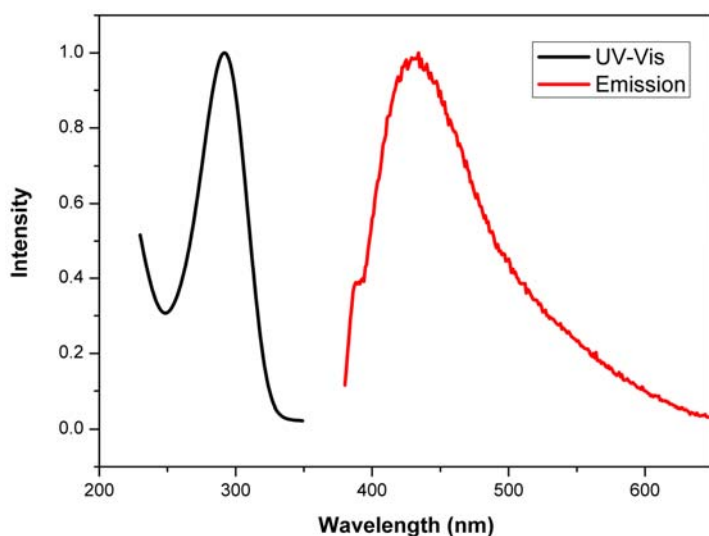

**Figure S1.** The UV-Vis (black) and luminescence (red) spectra of the deprotonated ligand at room temperature.

**Thermal Analysis:** The thermal analysis was performed on Netzsch STA449C under the flowing nitrogen atmosphere. A total of 5.831 mg of **1** was heated between room temperature and 1000 °C at a heating rate of 10 °C/min.

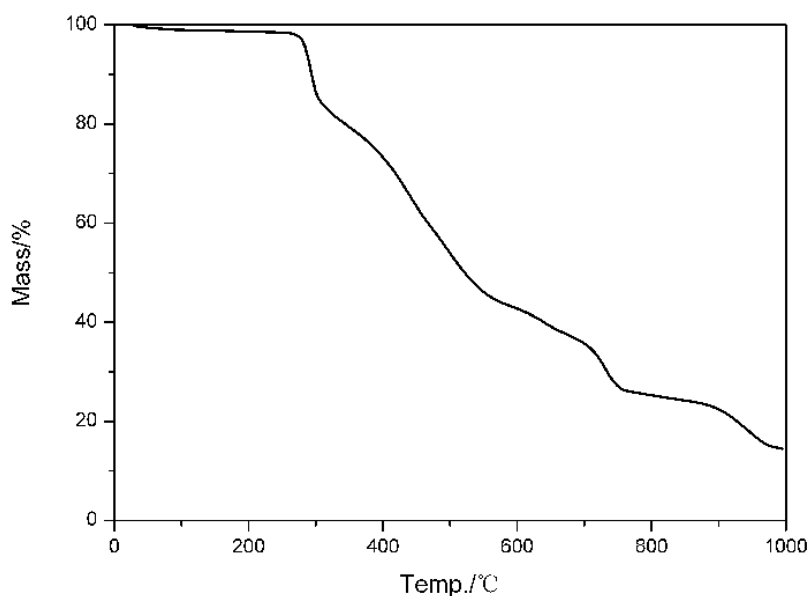

**Figure S2.** The TGA diagram of **1**. There is continuing weight loss from 260 to 980 °C. The remaining weight of 14.5% is likely from the decomposition product (Zn)

**X-ray powder diffraction:** X-ray powder diffraction experiments were performed on A PANalytical X'pert PRO diffractometer with Cu K $\alpha$  radiation (40 kV, 40 mA) was used to identify the crystal structure of the sample. The measurement was conducted in the continuous scanning mode. The 2 $\theta$  scanning range was from 10° to 75° in steps of 0.02° with a collection time of 12 s per step.

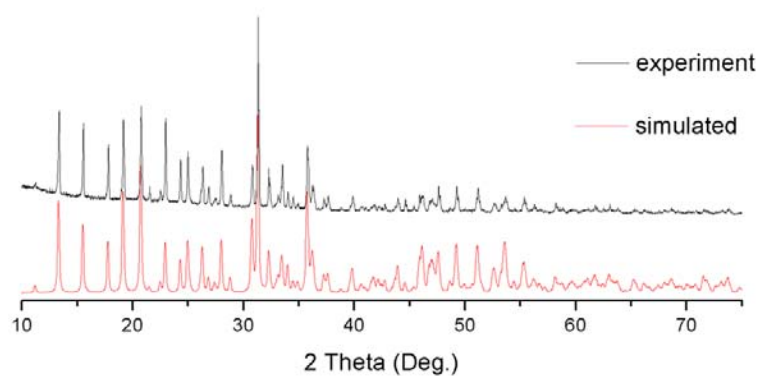

**Figure S3.** XPRD patterns for **1**. (top) Taken at room temperature; (bottom) calculated on the basis of the structure determined by single-crystal X-ray diffraction.
